# Supplementary material
Source: publisher figshare collection journal article supplement (https://acs.figshare.com/ndownloader/files/3987028)
Supplement: Supplementary file 1 [file 3987028]

## **SUPPORTING INFORMATION**

**Table S1.** Theoretical and observed *b*- and *y*-ions from MS/MS analysis of native and labeled L32-K42 in apoMb labeled with pLeu in lyophilized solids.

**Table S2.** Theoretical and observed *b*- and *y*-ions from MS/MS analysis of GCG (1-8)\* dimer in formulation containing peptide lyophilized with L-Leu.

**Fig S1.** FTIR (A) and far UV-CD spectra (B) of labeled and unlabeled apoMb.

**Fig S2.** Digest map of native apoMb digested with a combination of trypsin and chymotrypsin.

**Table S1.** Theoretical and observed *b*- and *y*-ions from MS/MS analysis of native and labeled L32-K42 in apoMb labeled with pLeu in lyophilized solids.

I. Product ions with  $z=+1$  produced by fragmenting native L32-K42 ( $m/z = 424.5609$ ;  $z=+3$ )

|   | <b>b-ions</b> | <b>Theoretical<br/><math>m/z^a</math></b> | <b>Observed<br/><math>m/z^b</math></b> | <b>y-ions</b> | <b>Theoretical<br/><math>m/z^a</math></b> | <b>Observed<br/><math>m/z^b</math></b> |
|---|---------------|-------------------------------------------|----------------------------------------|---------------|-------------------------------------------|----------------------------------------|
| L | $b_1$         | 114.0919                                  |                                        | $y_{11}$      | 1271.6636                                 |                                        |
| F | $b_2$         | 261.1604                                  | 261.1586                               | $y_{10}$      | 1158.5796                                 |                                        |
| T | $b_3$         | 362.2080                                  | 362.2050                               | $y_9$         | 1011.5111                                 | 1011.5070                              |
| G | $b_4$         | 419.2295                                  | 419.2223                               | $y_8$         | 910.4635                                  | 910.4603                               |
| H | $b_5$         | 556.2884                                  | 556.2834                               | $y_7$         | 853.442                                   | 853.4381                               |
| P | $b_6$         | 653.3412                                  |                                        | $y_6$         | 716.3831                                  | 716.3800                               |
| E | $b_7$         | 782.3838                                  | 782.3758                               | $y_5$         | 619.3303                                  | 619.3267                               |
| T | $b_8$         | 883.4314                                  | 883.4253                               | $y_4$         | 490.2877                                  | 490.2852                               |
| L | $b_9$         | 996.5155                                  |                                        | $y_3$         | 389.2401                                  | 389.2385                               |
| E | $b_{10}$      | 1125.5581                                 |                                        | $y_2$         | 276.1560                                  | 276.1544                               |
| K | $b_{11}$      | 1253.6531                                 |                                        | $y_1$         | 147.1134                                  | 147.1119                               |

II. Product ions with  $z=+2$  produced by fragmenting native L32-K42 ( $m/z = 424.5609$ ;  $z=+3$ )

|   | <b>y-ions<sup>c</sup></b> | <b>Theoretical<br/>m/z<sup>a</sup></b> | <b>Observed<br/>m/z<sup>b</sup></b> |
|---|---------------------------|----------------------------------------|-------------------------------------|
| L | $y_{11}$                  | 636.3357                               | 636.3344                            |
| F | $y_{10}$                  | 579.7937                               | 579.7910                            |
| T | $y_9$                     | 506.2595                               | 506.2572                            |
| G | $y_8$                     | 455.7357                               | 455.7332                            |
| H | $y_7$                     | 427.2249                               | 427.2230                            |
| P | $y_6$                     | 358.6955                               | 358.6935                            |
| E | $y_5$                     | 310.1691                               |                                     |
| T | $y_4$                     | 245.6478                               |                                     |
| L | $y_3$                     | 195.1240                               |                                     |
| E | $y_2$                     | 138.5819                               |                                     |
| K | $y_1$                     | 74.0606                                |                                     |

III. Product ions with  $z=+2$  produced by fragmenting labeled L32-K42 ( $m/z = 462.9133$ ;  $z=+3$ )

|   | y-ions   | (A)<br>Theoretical<br>$m/z$<br>(labeled) | (B)<br>Observed<br>$m/z$<br>(labeled) | (C)<br>Observed<br>$m/z$<br>(unlabeled) | Mass difference (u) <sup>d</sup><br>$M = M_{\text{labeled}} - M_{\text{unlabeled}}$ |
|---|----------|------------------------------------------|---------------------------------------|-----------------------------------------|-------------------------------------------------------------------------------------|
| L | $y_{11}$ | 693.8674                                 | 693.8649                              |                                         |                                                                                     |
| F | $y_{10}$ | 637.3254                                 | 637.3184                              | 579.789                                 | 115.0588                                                                            |
| T | $y_9$    | 563.7912                                 | 563.7873                              | 506.2524                                | 115.0698                                                                            |
| G | $y_8$    | 513.2673                                 | 513.2592                              | 455.7365                                | 115.0454                                                                            |
| H | $y_7$    | 484.7566                                 | 484.7525                              | 427.2245                                | 115.0560                                                                            |
| P | $y_6$    | 416.2271                                 | 416.2189                              | 358.6996                                | 115.0386                                                                            |
| E | $y_5$    | 367.7008                                 |                                       |                                         |                                                                                     |
| T | $y_4$    | 303.1795                                 |                                       |                                         |                                                                                     |
| L | $y_3$    | 252.6556                                 |                                       |                                         |                                                                                     |
| E | $y_2$    | 196.1136                                 |                                       |                                         |                                                                                     |
| K | $y_1$    | 131.5923                                 |                                       |                                         |                                                                                     |

<sup>a</sup> Calculated  $m/z$  values.

<sup>b</sup>  $m/z$  values obtained experimentally using mass spectrometry.

<sup>c</sup> No  $b$ -ions were detected by MS for  $z = +2$ .

<sup>d</sup> Mass difference  $M$  was calculated from  $m/z$  values in columns (B) and (C), using the formula  $M = (m/z) \cdot n - nH^+$ , where  $n$  is the number of charges on the  $y$ -ion and  $H$  is the mass of a proton ( $H=1.01$  u).

IV. Product ions with  $z=+1$  produced by fragmenting labeled L32-K42 ( $m/z = 462.9133$ ;  $z=+3$ )

|   | y-ions <sup>c</sup> | (A)<br>Theoretical<br>$m/z$<br>(labeled) | (B)<br>Observed<br>$m/z$<br>(labeled) | (C)<br>Observed<br>$m/z$<br>(unlabeled) | Mass difference<br>$M = M_{\text{labeled}} - M_{\text{unlabeled}}$ |
|---|---------------------|------------------------------------------|---------------------------------------|-----------------------------------------|--------------------------------------------------------------------|
| L | $y_{11}$            | 1386.7269                                |                                       |                                         |                                                                    |
| F | $y_{10}$            | 1273.6429                                |                                       |                                         |                                                                    |
| T | $y_9$               | 1126.5744                                |                                       |                                         |                                                                    |
| G | $y_8$               | 1025.5268                                |                                       |                                         |                                                                    |
| H | $y_7$               | 968.5053                                 |                                       |                                         |                                                                    |
| P | $y_6$               | 831.4464                                 | 831.4462                              | 716.3819                                | 115.0643                                                           |
| E | $y_5$               | 734.3936                                 | 734.3989                              | 619.3205                                | 115.0784                                                           |
| T | $y_4$               | 605.3510                                 | 605.3535                              | 490.289                                 | 115.0645                                                           |
| L | $y_3$               | 504.3034                                 |                                       | 389.2466                                |                                                                    |
| E | $y_2$               | 391.2193                                 |                                       | 276.1541                                |                                                                    |
| K | $y_1$               | 262.1767                                 |                                       | 147.1118                                |                                                                    |

<sup>a</sup> Calculated  $m/z$  values.

<sup>b</sup>  $m/z$  values obtained experimentally using mass spectrometry.

<sup>c</sup> No  $b$ -ions were detected by MS for  $z = +2$ .

<sup>d</sup> Mass difference  $M$  was calculated from  $m/z$  values in columns (B) and (C), using the formula  $M = (m/z) \cdot n - nH^+$ , where  $n$  is the number of charges on the  $y$ -ion and  $H$  is the mass of a proton ( $H=1.01$  u).

**Table S2.** Theoretical and observed *b*- and *y*-ions from MS/MS analysis of GCG (1-8)\* dimer from formulation containing peptide lyophilized with L-Leu. F\* denotes p-benzoyl-L-phenylalanine (pBpA). Calculated *m/z* values are denoted as ‘Theoretical *m/z*’ while *m/z* values obtained experimentally using mass spectrometry are denoted as ‘Observed *m/z*’.

I. Internal fragment (non-cross-linked) product ions with *z*=+1 produced by fragmenting GCG (1-8)\* dimer (*m/z* = 646.2783; *z*=+3)

|                 | <b><i>b</i>-ions</b>  | <b>Theoretical<br/><i>m/z</i><sup>b</sup></b> | <b>Observed<br/><i>m/z</i><sup>c</sup></b> | <b><i>y</i>-ions</b>  | <b>Theoretical<br/><i>m/z</i><sup>b</sup></b> | <b>Observed<br/><i>m/z</i><sup>c</sup></b> |
|-----------------|-----------------------|-----------------------------------------------|--------------------------------------------|-----------------------|-----------------------------------------------|--------------------------------------------|
| H               | <i>b</i> <sub>1</sub> | 138.0668                                      | 138.0656                                   | <i>y</i> <sub>8</sub> | 968.4110                                      |                                            |
| S               | <i>b</i> <sub>2</sub> | 225.0988                                      | 225.0973                                   | <i>y</i> <sub>7</sub> | 831.3521                                      |                                            |
| Q               | <i>b</i> <sub>3</sub> | 353.1574                                      | 353.1502                                   | <i>y</i> <sub>6</sub> | 744.3201                                      |                                            |
| G               | <i>b</i> <sub>4</sub> | 410.1789                                      |                                            | <i>y</i> <sub>5</sub> | 616.2615                                      |                                            |
| T               | <i>b</i> <sub>5</sub> | 511.2265                                      | 511.2234                                   | <i>y</i> <sub>4</sub> | 559.2400                                      | 559.2367                                   |
| F* <sup>a</sup> | <i>b</i> <sub>6</sub> | 762.3207                                      |                                            | <i>y</i> <sub>3</sub> | 458.1923                                      | 458.1916                                   |
| T               | <i>b</i> <sub>7</sub> | 863.3684                                      |                                            | <i>y</i> <sub>2</sub> | 207.0981                                      | 207.0963                                   |
| S               | <i>b</i> <sub>8</sub> | 950.4004                                      |                                            | <i>y</i> <sub>1</sub> | 106.0505                                      | 106.0497                                   |

II. Cross-linked product ions with  $z=+2$  produced by fragmenting GCG (1-8)\* dimer  
( $m/z = 646.2783$ ;  $z=+3$ )

|    | $b\sim\alpha$ -ions <sup>d</sup> | Theoretical<br>$m/z^b$ | Observed<br>$m/z^c$ | $\alpha$ -y-<br>ions | Theoretical<br>$m/z^b$ | Observed<br>$m/z^c$ |
|----|----------------------------------|------------------------|---------------------|----------------------|------------------------|---------------------|
| H  | $b_1$                            | 553.2400               |                     | y <sub>8</sub>       | 968.9173               | 968.9178            |
| S  | $b_2$                            | 596.7560               |                     | y <sub>7</sub>       | 890.8773               |                     |
| Q  | $b_3$                            | 660.7853               |                     | y <sub>6</sub>       | 847.3613               | 847.3526            |
| G  | $b_4$                            | 689.2960               | 689.2939            | y <sub>5</sub>       | 783.3320               | 783.3290            |
| T  | $b_5$                            | 739.8198               | 739.8130            | y <sub>4</sub>       | 754.8213               |                     |
| F* | $b_6$                            | 865.3669               | 865.3627            | y <sub>3</sub>       | 704.2975               |                     |
| T  | $b_7$                            | 915.8908               | 915.8929            | y <sub>2</sub>       | 578.7504               |                     |
| S  | $b_8$                            | 959.4068               |                     | y <sub>1</sub>       | 528.2265               |                     |

<sup>a</sup> F\* = p-benzoyl-L-phenylalanine (pBpA).

<sup>b</sup> Calculated  $m/z$  values.

<sup>c</sup>  $m/z$  values obtained experimentally using mass spectrometry.

<sup>d</sup>  $\alpha$  = GCG (1-8)\* monomer.

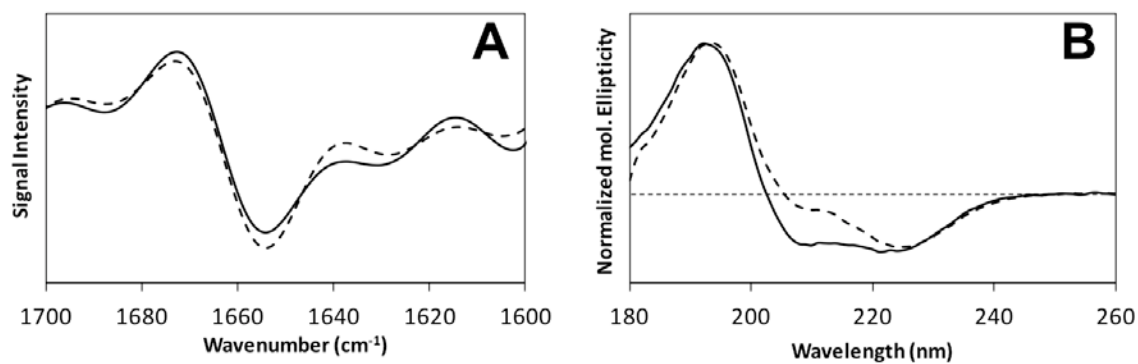

**Fig S1.** FTIR (A) and far UV-CD spectra (B) of labeled and unlabeled apoMb in lyophilized solids. ApoMb was co-lyophilized with sucrose and 100x molar excess of pLeu. The lyophilized formulation was irradiated at 365 nm for 40 min (dotted line), while the control was not irradiated (solid line).



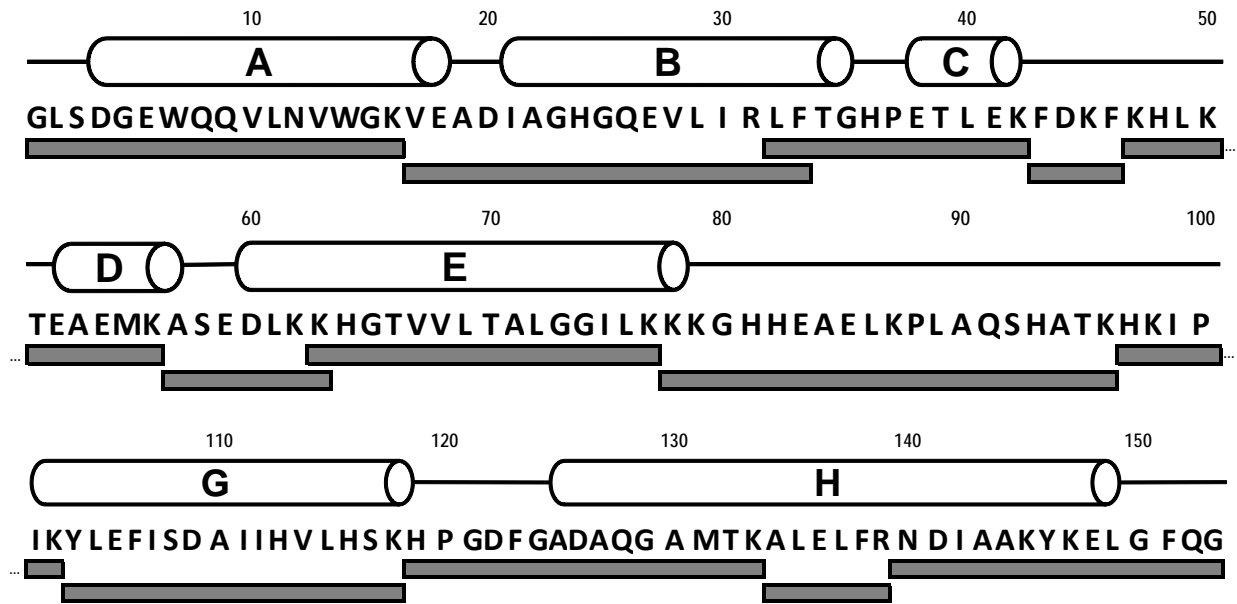

**Fig S2.** Digest map of native apoMb digested with a combination of trypsin and chymotrypsin. A total of 36 peptides were produced, of which the 13 shown by the shaded bars were selected to provide 100% sequence coverage.
